# Supplementary material for: Cross-Sectional Exploration of Plasma Biomarkers of Alzheimer’s Disease in Down Syndrome: Early Data from the Longitudinal Investigation for Enhancing Down Syndrome Research (LIFE-DSR) Study
Source: MDPI journal article supplement (doi:10.3390/jcm10091907), 2021-04-28
Supplement: s1 [file s1]

Article

# Cross Sectional Exploration of Plasma Biomarkers of Alzheimer's Disease in Down Syndrome: Early Data from the Longitudinal Investigation for Enhancing Down Syndrome Research (LIFE-DSR) Study

## Supplemental Materials

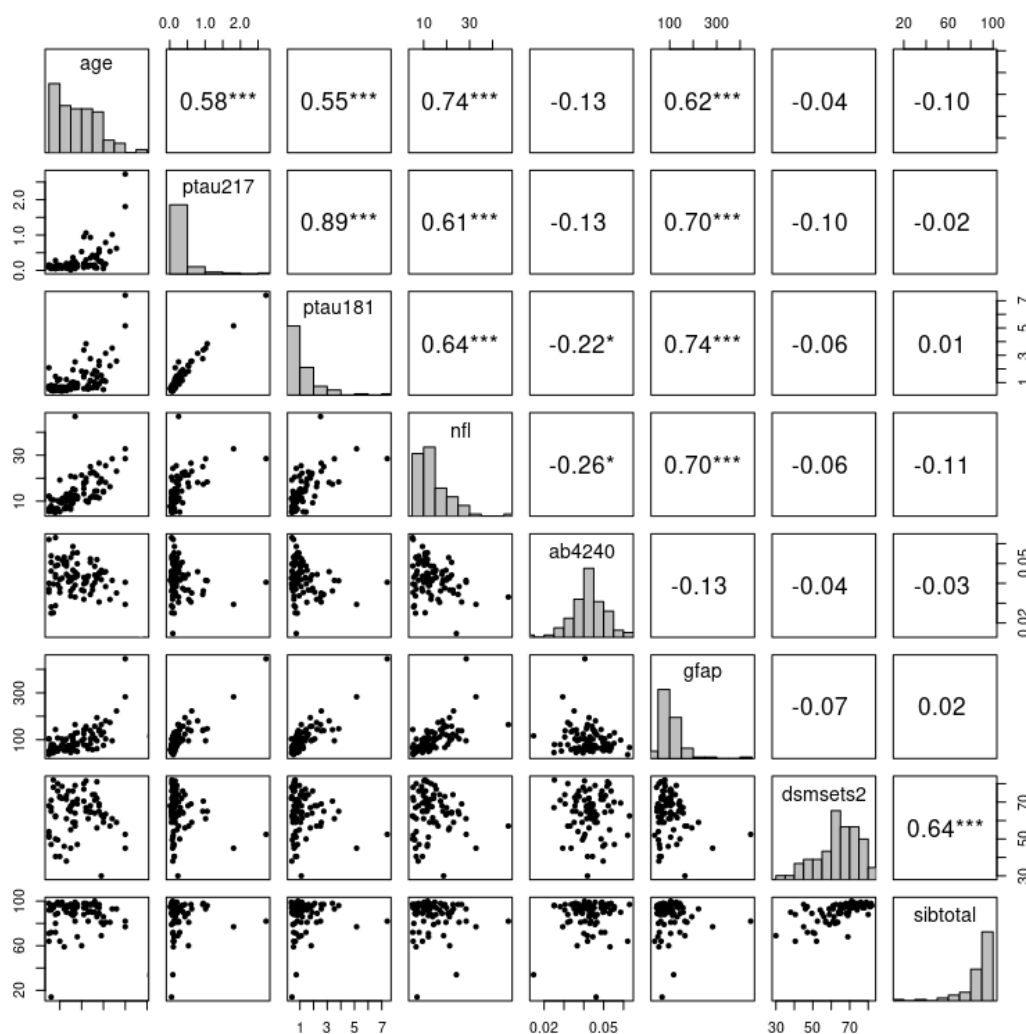

**Supplemental Figure 1.** Histograms (diagonal), scatterplots (below diagonal), and Spearman correlations (above diagonal) for biomarkers and clinical data. Stars indicate statistical significance at the unadjusted levels of  $p \leq 0.05^*$ ,  $0.01^{**}$ , and  $0.001^{***}$ . A Bonferroni corrected significance level is  $p = 0.05/28 = 0.0018$ . (Abbreviations:  $A\beta_{42/40}$  = amyloid  $\beta_{42/40}$  ratio, dsmset2 = Down Syndrome Mental Status Examination method 2 score, GFAP = glial fibrillary acidic protein, NfL = neurofilament light, p = p-value, ptau181 = phosphorylated tau at threonine-181, ptau217 = phosphorylated tau at threonine-217, sibtotal = Severe Impairment Battery total score).

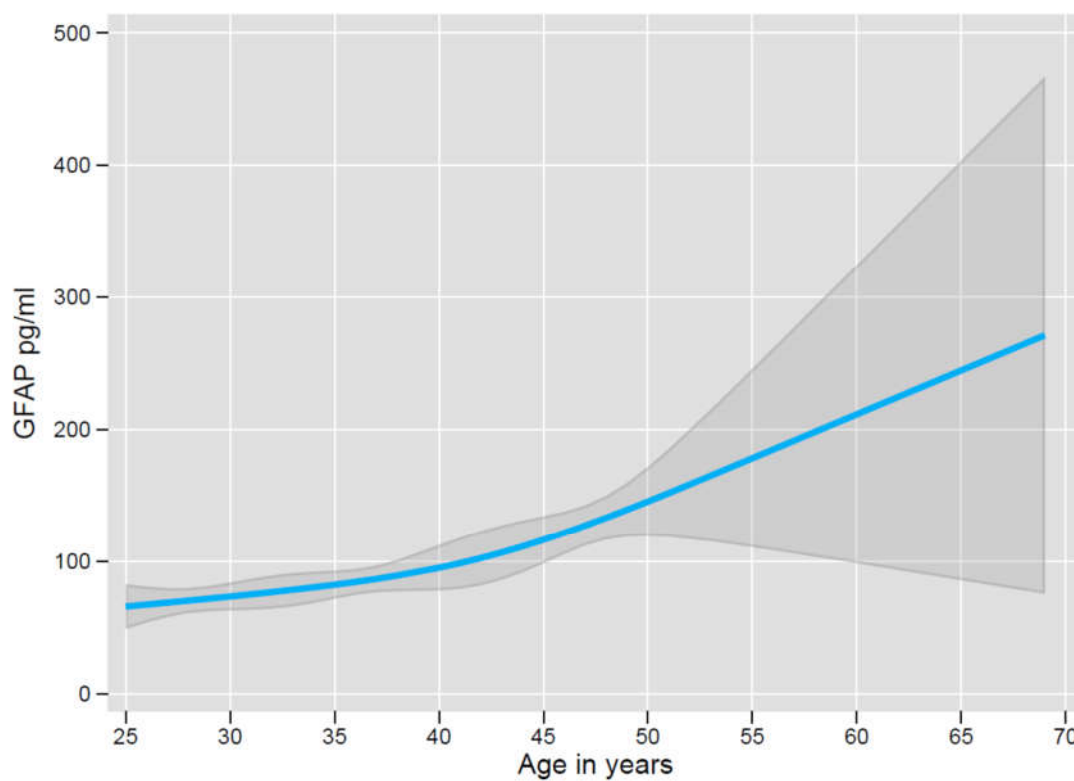

**Supplemental Figure 2.** Linear regression fit of untransformed GFAP on age, using restricted cubic splines with 4 knots and robust standard errors.  $F(3,82) = 14.05$ ,  $p < 0.0001$ . (Abbreviations: GFAP = glial fibrillary acidic protein,  $F(df1,df2)$  = F statistic (degrees of freedom 1, degrees of freedom 2),  $p$  = p-value, pg/mL = picogram/milliliter).

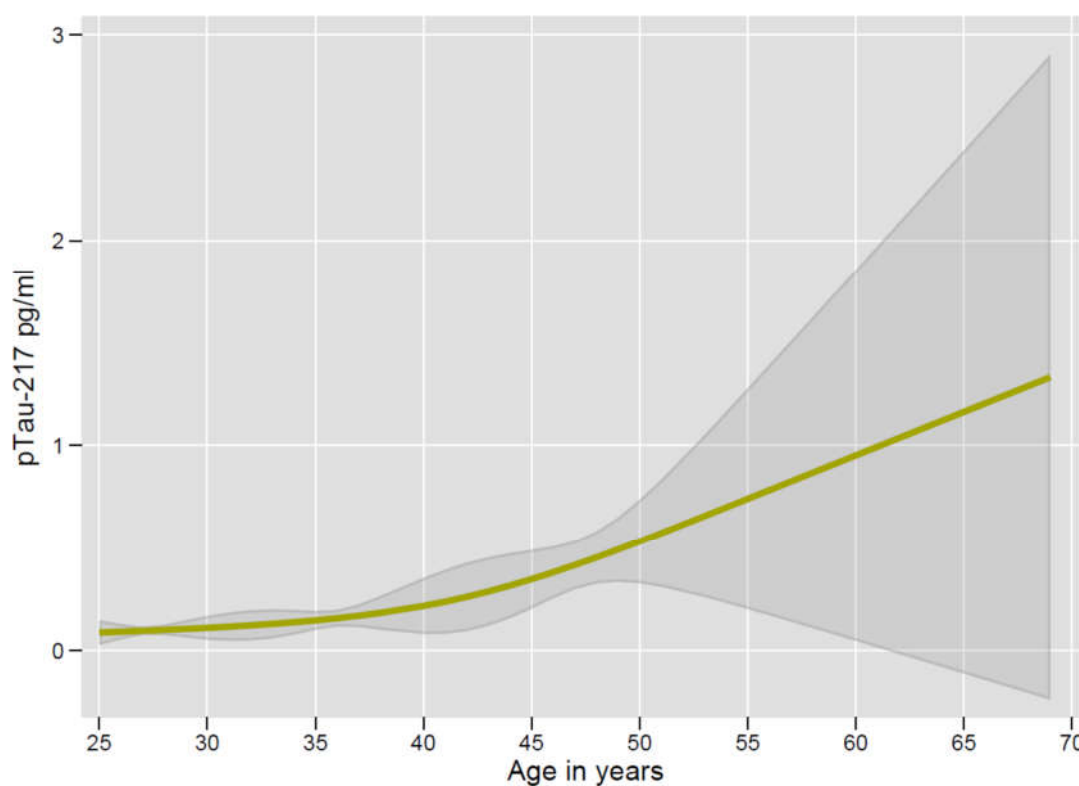

**Supplemental Figure 3.** Linear regression fit of untransformed p-tau 217 on age, using restricted cubic splines with 4 knots and robust standard errors.  $F(3,82) = 9.91$ ,  $p < 0.0001$ . (Abbreviations:  $F(df1,df2)$  = F statistic (degrees of freedom 1, degrees of freedom 2),  $p$  = p-value, p-tau 217 = phosphorylated tau at threonine-217, pg/mL = picogram/milliliter).

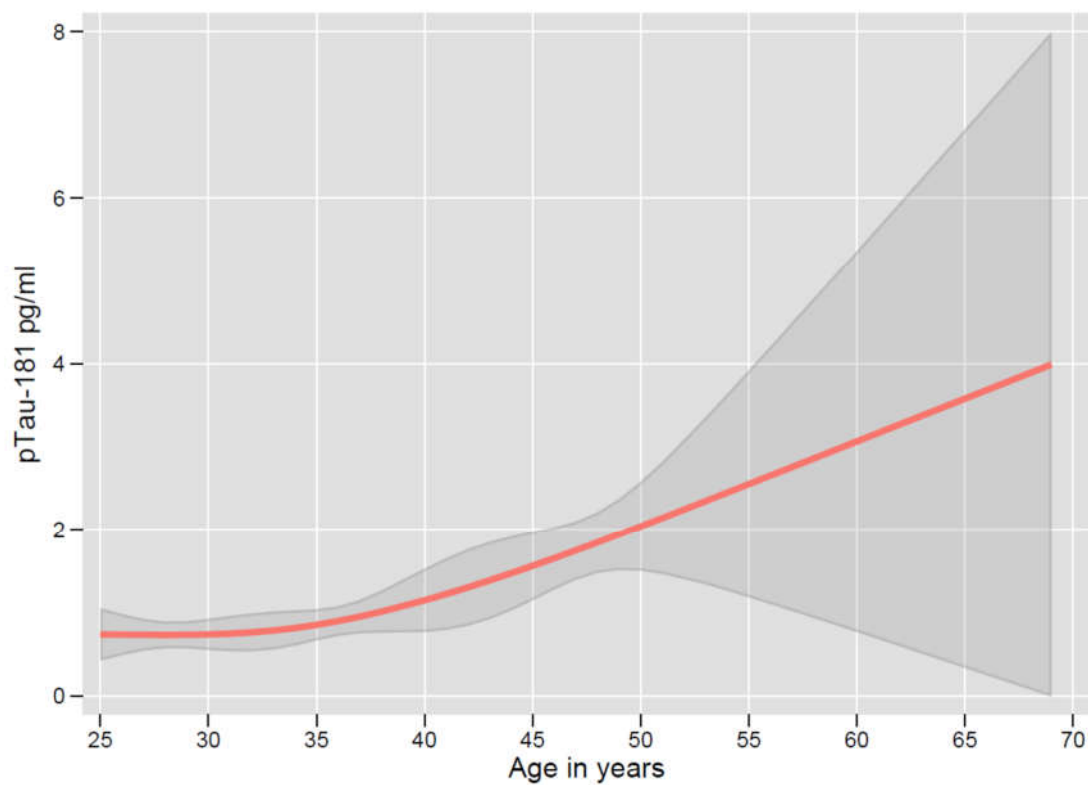

**Supplemental Figure 4.** Linear regression fit of untransformed p-tau 181 on age, using restricted cubic splines with 4 knots and robust standard errors.  $F(3,82) = 10.14$ ,  $p < 0.0001$ . (Abbreviations:  $F(df1,df2)$  = F statistic (degrees of freedom 1, degrees of freedom 2),  $p$  = p-value, p-tau 181 = phosphorylated tau at threonine-181, pg/mL = picogram/milliliter).

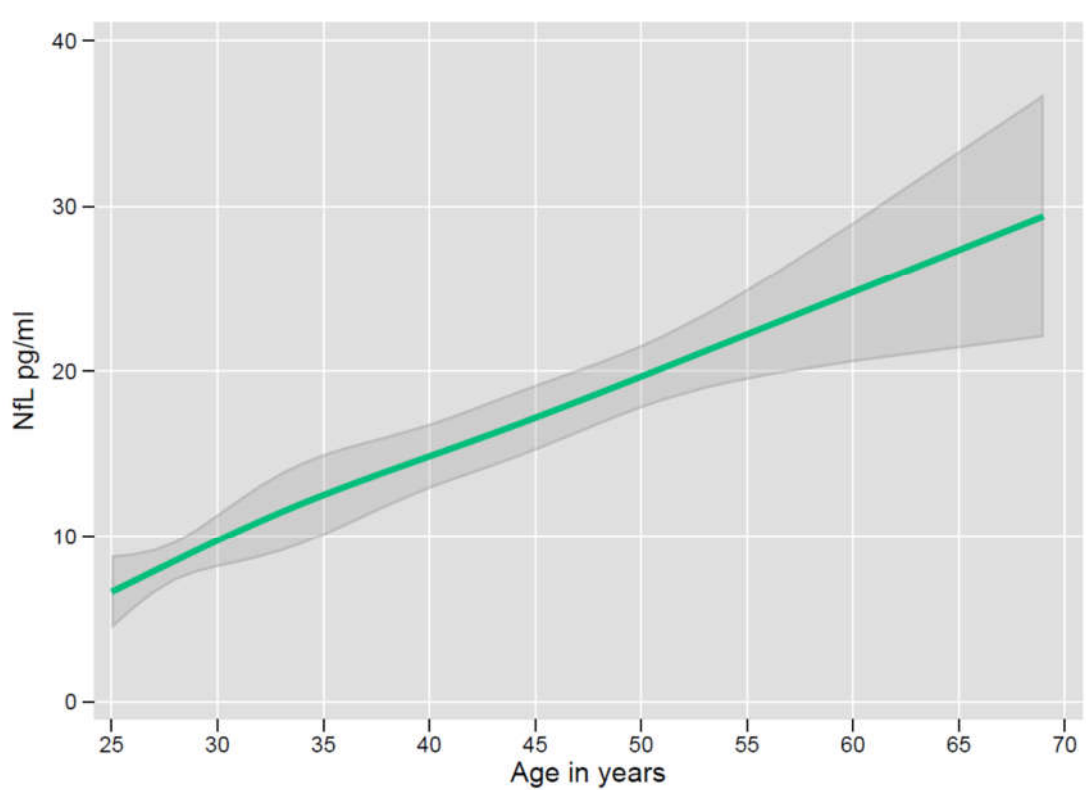

**Supplemental Figure 5.** Linear regression fit of untransformed NfL on age, using restricted cubic splines with 4 knots and robust standard errors.  $F(3,82) = 34.57$ ,  $p < 0.0001$ . (Abbreviations:  $F(df1,df2)$  = F statistic (degrees of freedom 1, degrees of freedom 2), NfL = neurofilament light,  $p$  = p-value, pg/mL = picogram/milliliter).

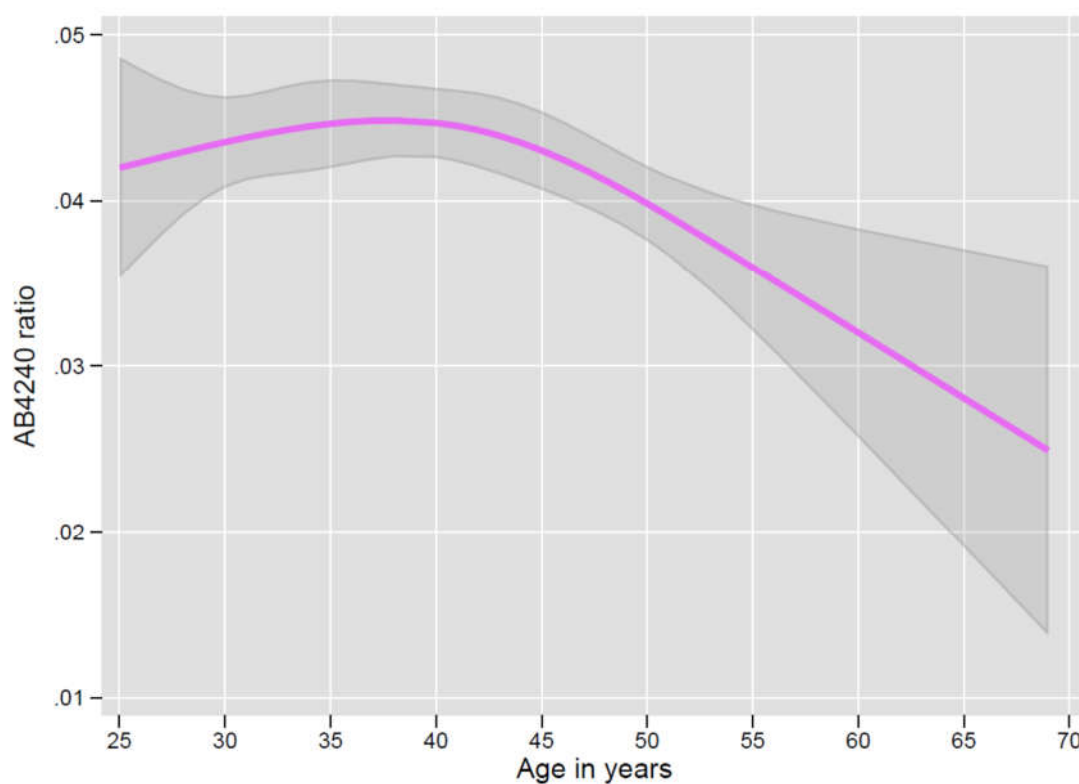

**Supplemental Figure 6.** Linear regression fit of untransformed  $A\beta_{42}/A\beta_{40}$  ratio on age, using restricted cubic splines with 4 knots and robust standard errors.  $F(3,82) = 4.71$ ,  $p = 0.0044$ ;  $F(3,81) = 2.41$ ,  $p = 0.0728$  without oldest individual. (Abbreviations:  $A\beta_{42/40}$  = amyloid  $\beta_{42/40}$ ,  $F(df1,df2)$  = F statistic (degrees of freedom 1, degrees of freedom 2),  $p$  = p-value).

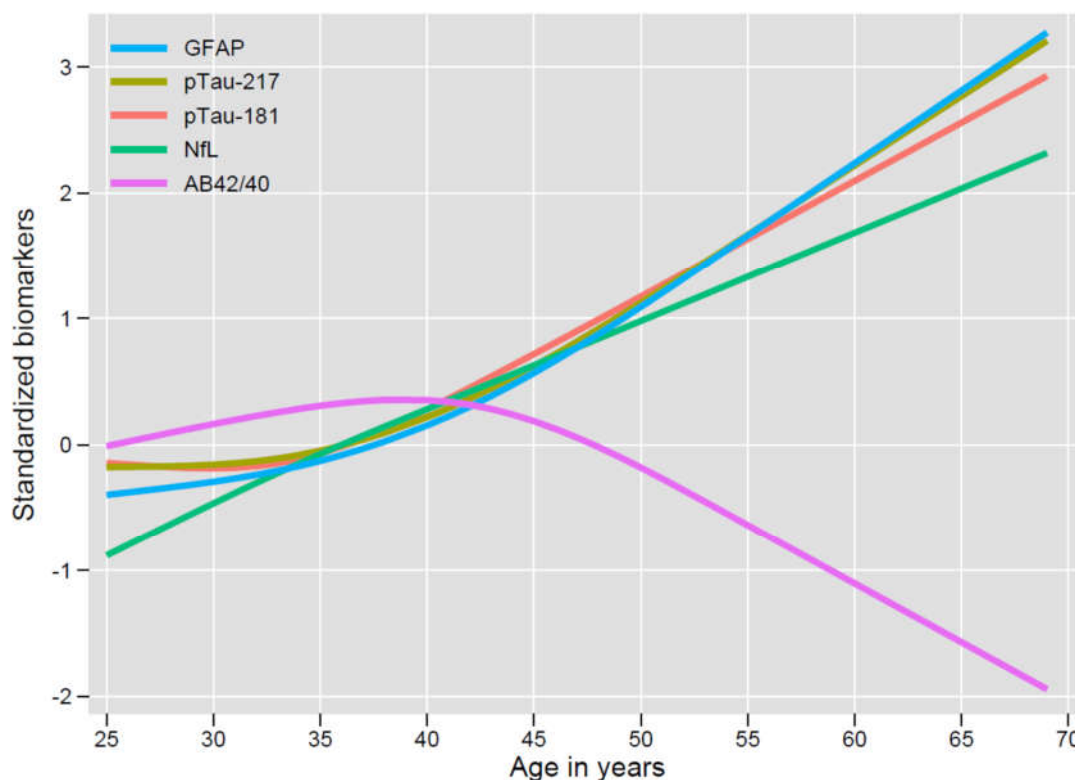

**Supplemental Figure 7.** Shown are the predictions from linear regressions of each biomarker on age, using restricted cubic splines with 4 knots, and adjusted for *APOE ε4* carrier status and sex using additive covariates; *APOE ε4* adjusted to non-carrier and sex adjusted to female. GFAP:  $F(3,80) = 11.23$ ,  $p < .0001$ ; p-tau 217:  $F(3,80) = 7.79$ ,  $p = .0001$ ; p-tau 181:  $F(3,80) = 9.25$ ,  $p < .0001$ ; NfL:  $F(3,80) = 36.02$ ,  $p < .0001$ ;  $A\beta_{42}/A\beta_{40}$  ratio:  $F(3,80) = 5.01$ ,  $p = .0031$ , without oldest individual  $F(3,79) = 2.04$ ,  $p = 0.1146$ . (Abbreviations:  $A\beta_{42}/40$  = amyloid  $\beta_{42}/40$  ratio, *APOE ε4* = Apolipoprotein E  $\epsilon 4$  allele, GFAP = glial fibrillary acidic protein,  $F(df1,df2)$  = F statistic (degrees of freedom 1, degrees of freedom 2), NfL = neurofilament light,  $p$  = p-value, p-tau 181 = phosphorylated tau at threonine-181, p-tau 217 = phosphorylated tau at threonine-217).

**Publisher's Note:** MDPI stays neutral with regard to jurisdictional claims in published maps and institutional affiliations.

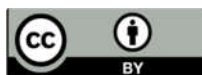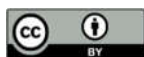

**Copyright:** © 2021 by the authors. Licensee MDPI, Basel, Switzerland. This article is an open access article distributed under the terms and conditions of the Creative Commons Attribution (CC BY) license (<http://creativecommons.org/licenses/by/4.0/>).

by the author. Licensee MDPI, Basel, Switzerland. This article is an open access article distributed under the terms and conditions of the Creative Commons Attribution (CC BY) license (<http://creativecommons.org/licenses/by/4.0/>).
